# Supplementary material for: Enhanced antibacterial activity of acid treated MgO nanoparticles on Escherichia coli
Source: Royal Society of Chemistry journal article supplement (doi:10.1039/d1ra06221b), 2021-01-01
Supplement: d1ra06221b1.pdf [file d1ra06221b1.pdf]

## Electronic Supplementary Information (ESI†)

### **Enhanced Antibacterial Activity of Acid Treated MgO Nanoparticles on *Escherichia coli***

Xiaoyi Li, Xiaoyu Hong, Yan Yang,\* Jiao Zhao,\* Catherine Sekyerebea Diko and  
Yimin Zhu\*

*Collaborative Innovation Center for Vessel Pollution Monitoring and Control, Dalian  
Maritime University, 116026 Dalian, China*

Corresponding authors E-mail: [yyang@dlmu.edu.cn](mailto:yyang@dlmu.edu.cn); [zhaojiao@dlmu.edu.cn](mailto:zhaojiao@dlmu.edu.cn);  
[ntp@dlmu.edu.cn](mailto:ntp@dlmu.edu.cn).

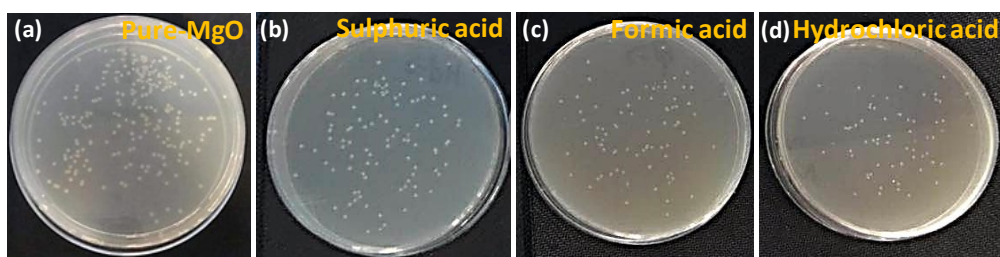

**Fig. S1** The representative photographs for the surviving *E. coli* colonies of Pure-MgO (a) and samples treated with different acidic solutions (pH=2) for 1 h, sulphuric acid (b), formic acid (c) and hydrochloric acid (d).

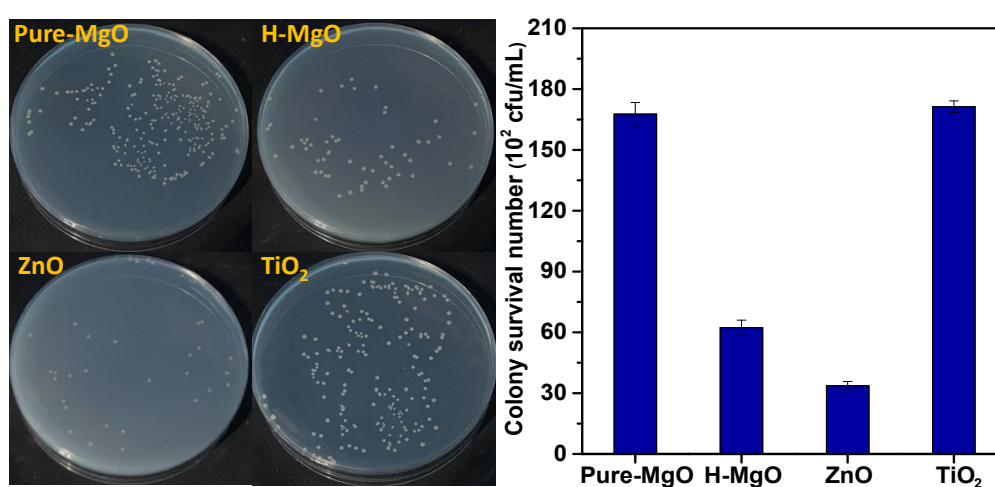

**Fig. S2** The antibacterial activities against *E. coli* of Pure-MgO, H-MgO, ZnO (AR, Tianjin Guangfu Fine Chemical Research Institute, China) and TiO<sub>2</sub> (P25, Degussa, Germany) with 750  $\mu\text{g/mL}$  at 4 h.

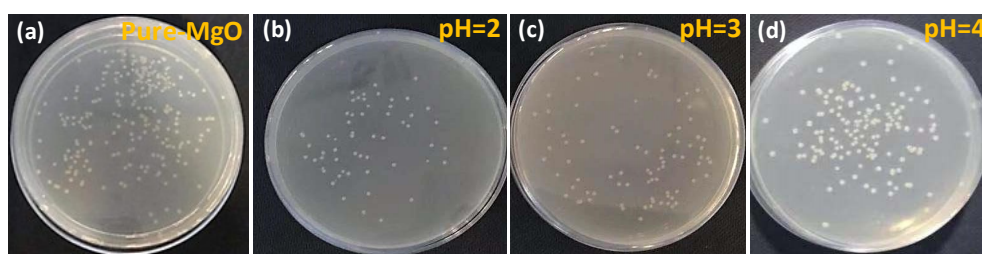

**Fig. S3** The representative photographs for the surviving *E. coli* colonies of Pure-MgO (a) and MgO NPs treated with hydrochloric acid for 1 h at different pH, pH=2 (b), pH=3 (c) and pH=4 (d).

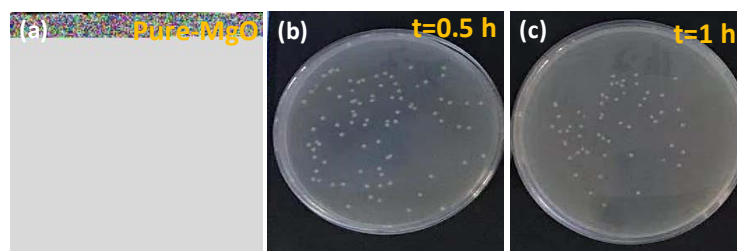

**Fig. S4** The representative photographs for the surviving *E. coli* colonies of Pure-MgO (a) and MgO NPs treated with hydrochloric acid at pH=2 for different treatment time,  $t=0.5$  h (b) and  $t=1$  h (c).

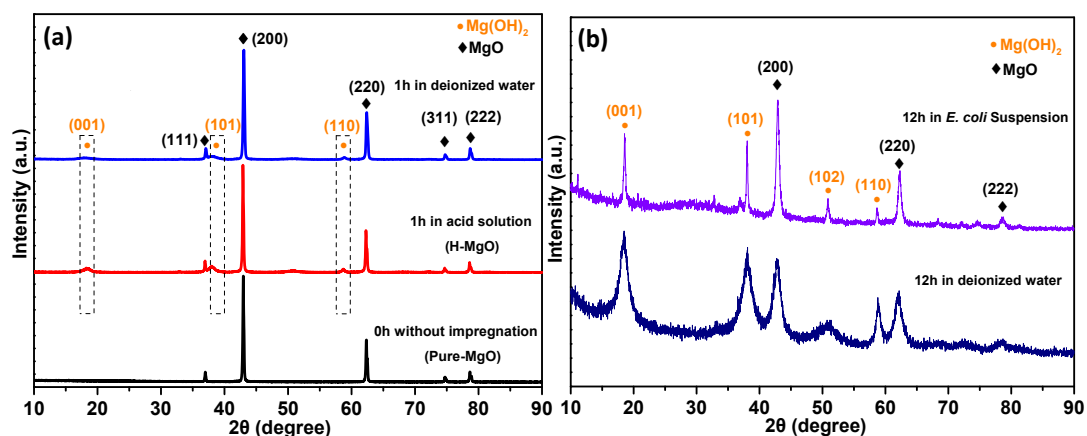

**Fig. S5** XRD patterns of Pure-MgO, H-MgO and Pure-MgO impregnated in deionized water for 1 h (a) and Pure-MgO impregnated in deionized water and *E. coli* suspension for 12 h respectively (b).

The Pure-MgO samples were impregnated in deionized water for 1 h, 12 h and in *E. coli* ( $10^8$  CFU/mL) suspension for 12 h respectively. After impregnation, the samples were collected by centrifugation at 9000 rpm for 5 min and then dried in the oven at 110 °C for 12 h. Then, the obtain samples were analyzed by XRD.

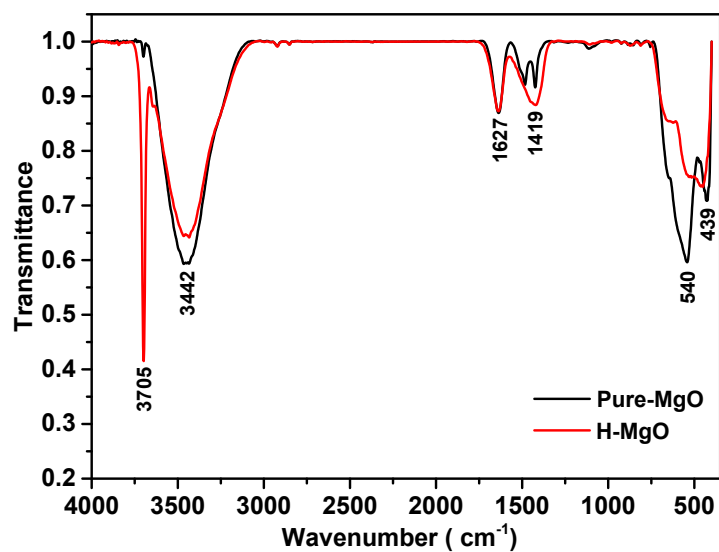

Fig. S6 FTIR spectra of Pure-MgO and H-MgO.

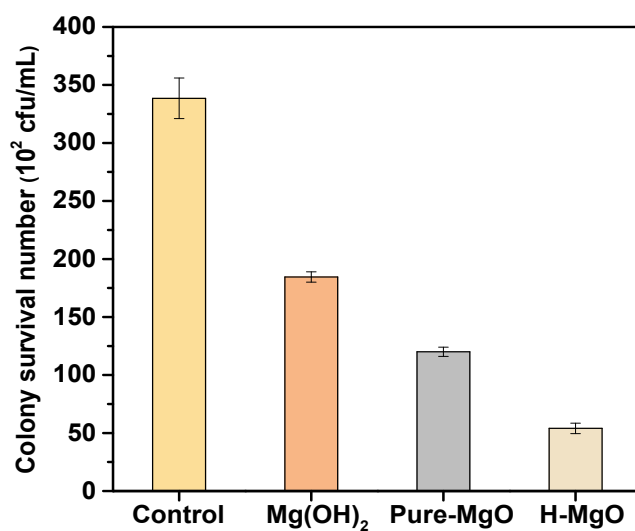

Fig. S7 The antibacterial activities of  $\text{Mg}(\text{OH})_2$ , Pure-MgO and H-MgO on *E. coli*.

Table S1 The lattice parameters of Pure-MgO and H-MgO determined from XRD.

| Samples  | 2-Theta (°) | FWHM (°) | <i>d</i> -Spacing (Å) | Crystallite size (nm) |
|----------|-------------|----------|-----------------------|-----------------------|
| Pure-MgO | 42.942      | 0.184    | 2.1044                | 45.9                  |
| H-MgO    | 42.897      | 0.216    | 2.1065                | 39.1                  |
